# Supplementary material for: A plausible mechanism for the antimalarial activity of artemisinin: A computational approach
Source: PubMed Central journal article supplement — Sci Rep. 2013 Aug 29;3:2513. doi: 10.1038/srep02513 (PMC3756341; doi:10.1038/srep02513), 2013-08-29
Supplement: srep02513-s1.pdf [file srep02513-s1.pdf]

# A plausible mechanism for the antimalarial activity of artemisinin: A computational approach

Ashutosh Shandilya<sup>1</sup>, Sajeew Chacko<sup>2</sup>, B. Jayaram<sup>1,3\*</sup>, Indira Ghosh<sup>2\*</sup>

<sup>1</sup> *Department of Chemistry & Supercomputing Facility for Bioinformatics & Computational Biology, Indian Institute of Technology, Hauz Khas, New Delhi 110016,*

<sup>2</sup> *School of Computational and Integrative Science, Jawaharlal Nehru University, New JNU Campus, New Delhi – 110 067, India*

<sup>3</sup> *Kusuma School of Biological Sciences, Indian Institute of Technology, Hauz Khas, New Delhi 110016, India*

Website: [www.scfbio-iitd.res.in](http://www.scfbio-iitd.res.in)

Email: B. Jayaram: [bjayaram@chemistry.iitd.ac.in](mailto:bjayaram@chemistry.iitd.ac.in)

Indira Ghosh: [indira0654@gmail.com](mailto:indira0654@gmail.com);

\*Authors for correspondence

Alignment score=1956  
Length of sequence 1:1228(1U5N)  
Length of sequence 2:994 (1SU4)  
Aligned length :971  
Identical length :495  
Sequence identity=0.510 495/971

```
Seq1 8 AHTYDVEDVLKFLDVNKDNLKNEELDRRLKYGLNELEVEKKSIFELILNQFDDLLVK 67
    :: : : : :: :::: : :: :: ::::
Seq2 4 AHSKSTEECLAYFGVSETTGLTPDQVKRHLEKYGHNELPAEEGKSLWELVIEQFEDLLVR 63

Seq1 68 ILLLAAFISFVLTLDMKHKKIEICDFIEPLVIVLILILNAAVGWQECNAEKSLEALKE 127
    ::::: ::::: : : :: :: ::::: :: ::::: :::::
Seq2 64 ILLLAACISFVLAWFEEGETITA--FVEPFVILLILIANAIVGWQERNAENAIEALKE 121

Seq1 128 LQPTKAKVLRDGKWEI--IDSKYLVDIIELSVGNKTPADARIKIYSTSLKVEQSMILT 185
    : :: : : :::: : : : :::: : : : : : : : : : :
Seq2 122 YEPENGVYRDRKSVQRIKARDIVPGDIVEVAVGDKVPADIRILSIKSTTLRVDQSILT 181

Seq1 186 GESCSVDKYAEKMEDSYKNCEIQLKKNILFSSTAIVCGRCIAVINIGMKEIGHIQHAV 245
    :::: : : : : :::: :::: : : : : : : : : : :
Seq2 182 GESVSVIKHTEPVDP--RAVNQDKKNMLFSGTNIAAGKALGIVATTGVSTEIGKIRDQM 239

Seq1 246 IESNSEDQTPLQIKIDLFGQQLSKIIFVICVTWIIINFKHFSDPIHG-SFLYGCLYYFK 304
    : :::: : : : :::: : : : : : : : : : : : : : :
Seq2 240 --AATEQDKTPLQQLDEFGEQLSKVISLICVAVWLINIGHFNDPVHGGSWIRGAIYYFK 297

Seq1 305 ISVALAVAAIPEGLPAVITTCALGTRRMVKNNAIVRKLQSVETLGCTTVICSDKTGTLT 364
    : ::::: ::::: ::::: ::::: : : : : : : : : : : : :
Seq2 298 IAVALAVAAIPEGLPAVITTCALGTRRMAKKNNAIVRSLPSVETLGCTSVICSDKTGTLT 357

Seq1 365 TNQMTTTFVHFLFRESDSLTEYQLCQKGDYTFYESSNLNDIYAGESSFNKLDKDEGNVE 424
    :::: : : :::: : : : : : : : : : :
Seq2 358 TNQMSVCKMFIIDKVD-----GDFCSLNEFS-ITGSTYA-----PEGEV- 395

Seq1 425 ALTDDGEEGSIDEADPYSDFSSDSKMKNDLNNNNNNNNSSRSKAKRNIPLKEMKSNE 484
    :::: : : : : : : : : : :
Seq2 396 -----LKN-----KPIRSGQFDG--LVELAT-- 415

Seq1 485 NTIISRGSKILEDKINKYCYSEYDYNFYMCLVNCNEANIFCNDNSQIVKFGDSTELALL 544
    : :: : : : : : : : : : :
Seq2 416 -----ICAL-CNDSSLDFNETKGVYKVGGEATETAL- 445

Seq1 545 HFVHNFILPTFSKNNKMPAEYEKNTTPVQSSNKKDKSPRGINKFFSSKNDNSHITSTLN 604
    :: : : : : : : : : : :
Seq2 446 -----TTLVEKMN-----VFN 456

Seq1 605 ENDKNLKNANHSNYTTAQTATNGYEAIAGENTFEHGTSFENCFHSLGNKINTTSTHNNNN 664
    :: : : : : : : : : : :
Seq2 457 TEVRNLSKVERAN----- 469

Seq1 665 NNNNSNSVPSECISSWRNECKQIKIIEFTRERKLMSVIVENKKKEII-----LYCKGAP 719
    : : : : : : : : : : : : : : : :
Seq2 470 -----ACNSVIRQLMKKEFTLEFSRDRKSMSVYCSPAKSSRAAVGNKMFVKGAP 518
```

```

Seq1 720 ENIIKNCKYYLTKNDIRPLNETLKNEIHNKIQNMG--KRALRTLSFAYKKLSSK--DLNI 775
      : : : : : : : : : : : : : : : : : :
Seq2 519 EGVIDRCNYVRVGTTRVPMTPGVKEKILSVIKEWGTGRDTRLRCLALATRDTPPKREEMVL 578

Seq1 776 KNTDDYYKLEQDLIYLGGLGIIDPPRKYVGRAIRLCHMAGIRVFMITGDNINTARAIKE 835
      : : : : : : : : : : : : : : : : : :
Seq2 579 DDSSRFMEYETDLTFVGVVGLDPPRKEVMGSIQLCRDAGIRVIMITGDNKGTAIAICRR 638

Seq1 836 INILNKNEGDDEKDNNTNNKNTQICCYNGREFEDFSLEKQKHILKNTPRIVFCRTEPKHK 895
      : : : : : : : : : : : : : : : : : :
Seq2 639 IGIFGENEEVADR-----AYTGREFDDLPLAEQREACRRA--CCFARVEPSHK 684

Seq1 896 KQIVKVLKDLGETVAMTGDGVNDAPALKSADIGIAMGINGTEVAKEASDIVLADDFNTI 955
      : : : : : : : : : : : : : : : : : :
Seq2 685 SKIVEYLQSYDEITAMTGDGVNDAPALKKAEIGIAMG-SGTAVAKTASEMVLADDFSTI 743

Seq1 956 VEAIKEGRCIYNNMKAFIRYLISSNIGEVASIFITALLGIPDSLAPVQLLWVNLVTDGLP 015
      : : : : : : : : : : : : : : : : : :
Seq2 744 VAAVEEGRAIYNNMKQFIRYLISSNVEVVCIFLTAALGLPEALIPVQLLWVNLVTDGLP 803

Seq1 016 ATALGFNPPEHDMKCKPRHKNDNLINGLTLRYIIIGTYVGIATVSIFVYWFVLPDSD 075
      : : : : : : : : : : : : : : : : : :
Seq2 804 ATALGFNPPDLDIMDRPPRSPKEPLISGWLFFRYMAIGGYGAATVGAAAWWFMYAEDGP 863

Seq1 076 MHTLINFYQLSHYNQCKAWNNFRVNVKYDMSEDH-----CSYFSAGKIKASTLSLSVL 128
      : : : : : : : : : : : : : : : : : :
Seq2 864 G---VTYHQLTHFMQC-----TEDHPHFEGLDCEIFEAPE--PMTMALSVL 904

Seq1 129 VLIEMFNALNALSEYNSLFEIPPWRNMYLVLATIGSLLLHVLIYIPPLARIFGVVPLSA 188
      : : : : : : : : : : : : : : : : : :
Seq2 905 VTIEMCNALNSLSENQSLMRMPPWVNIWLLGSICLSMSLHFLIYVDPLPMIFKALKDL 964

Seq1 189 YDWFLVFLWSFPVILDEIIKIFYAKRKLK 217
      : : : : : : : : : : : : : : : :
Seq2 965 TQWLMVLKISLPVIGLDEILKFIARNYLE 993

```

Since there is no experimentally determined 3D structure for PfATP6 and therefore, any question related to the study of protein-ligand interactions involving pfATP6 must rely solely on models. PfATP6 and mammalian SERCA share 51% identity which is considerably reasonable for homology modeling. Apart from the phospholomban domain (residue no 578-675) which is not present in the mammalian SERCA (this domain is far from the ligand binding site region), there is no major difference in the active site residues of the two enzymes. Alignment and superposition Of the structures of two proteins (1SU4 mammalian SERCA in green and 1U5N (model of *pf*ATP6) in red is shown below.

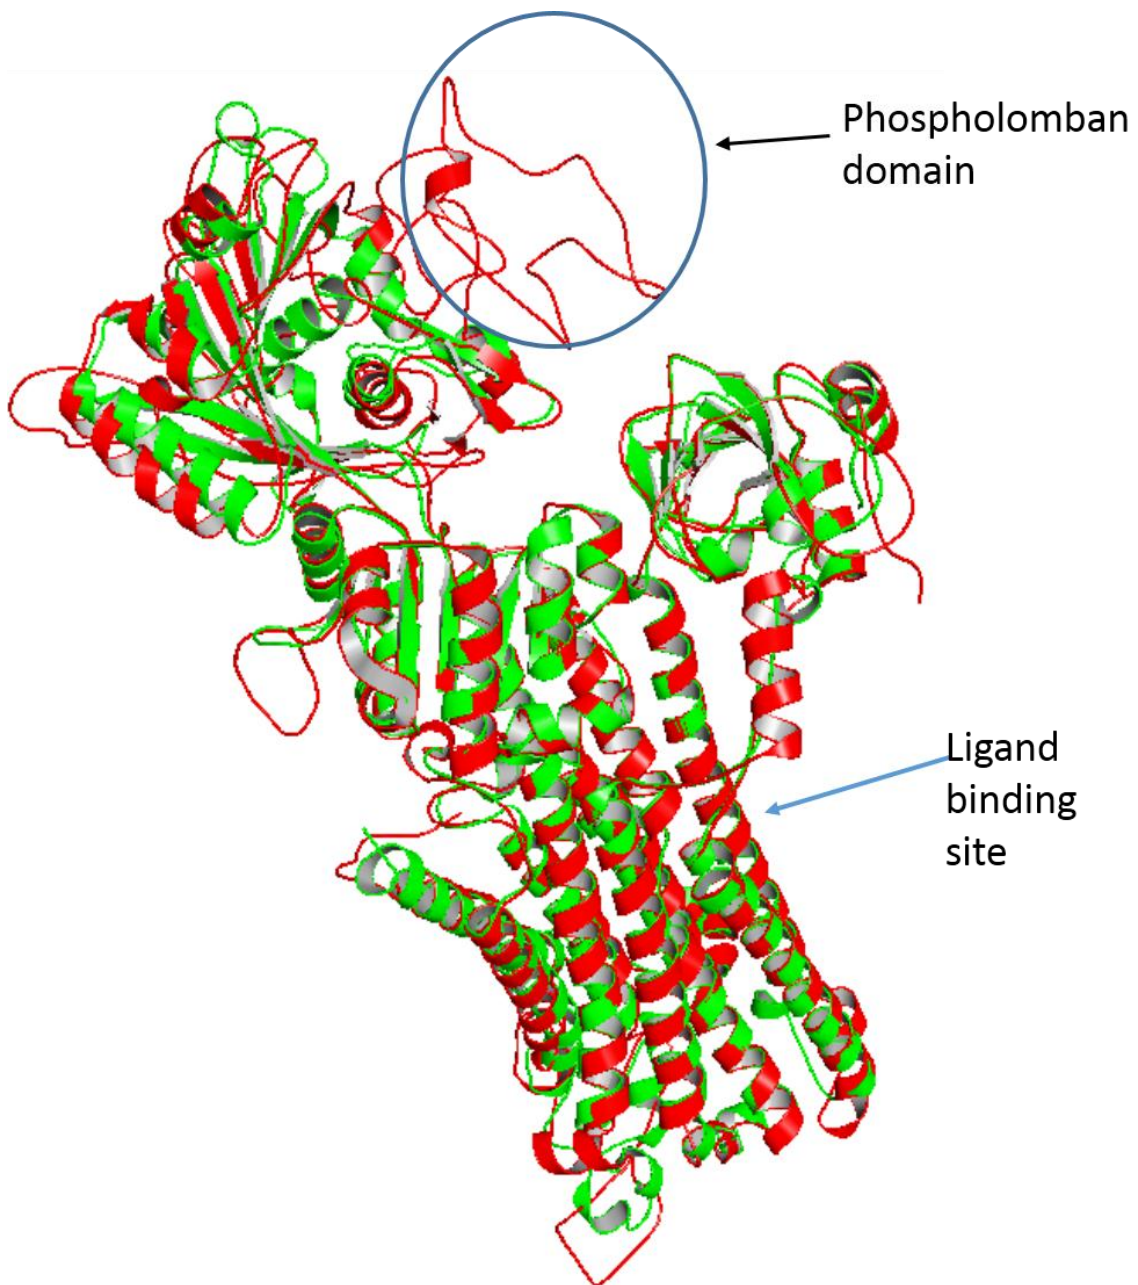

**Fig. S1:** Superposition of crystal structure of mammalian SERCA in green and model structure of Plasmodium SERCA (*pfATP6*) in red.

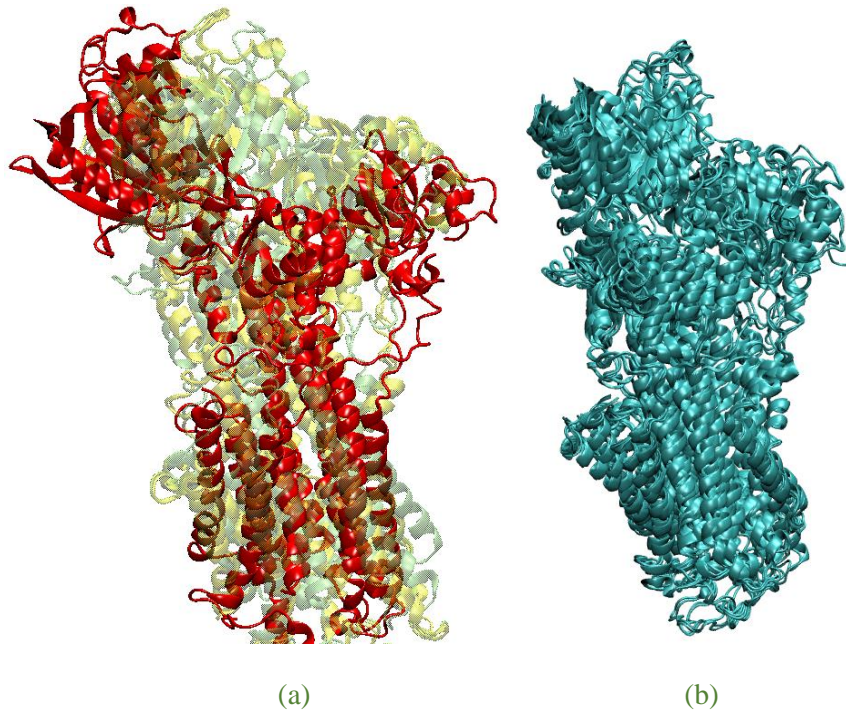

**Fig S2:** (a) Superimposition of all 41 structures along with 1SU4 and 2C9M (open conformation) shown in red and orange color respectively. Remaining mammalian SERCA structures are shown in transparent colors to avoid confusion. (b) Superimposition of all 39 closed conformation structures in one color.

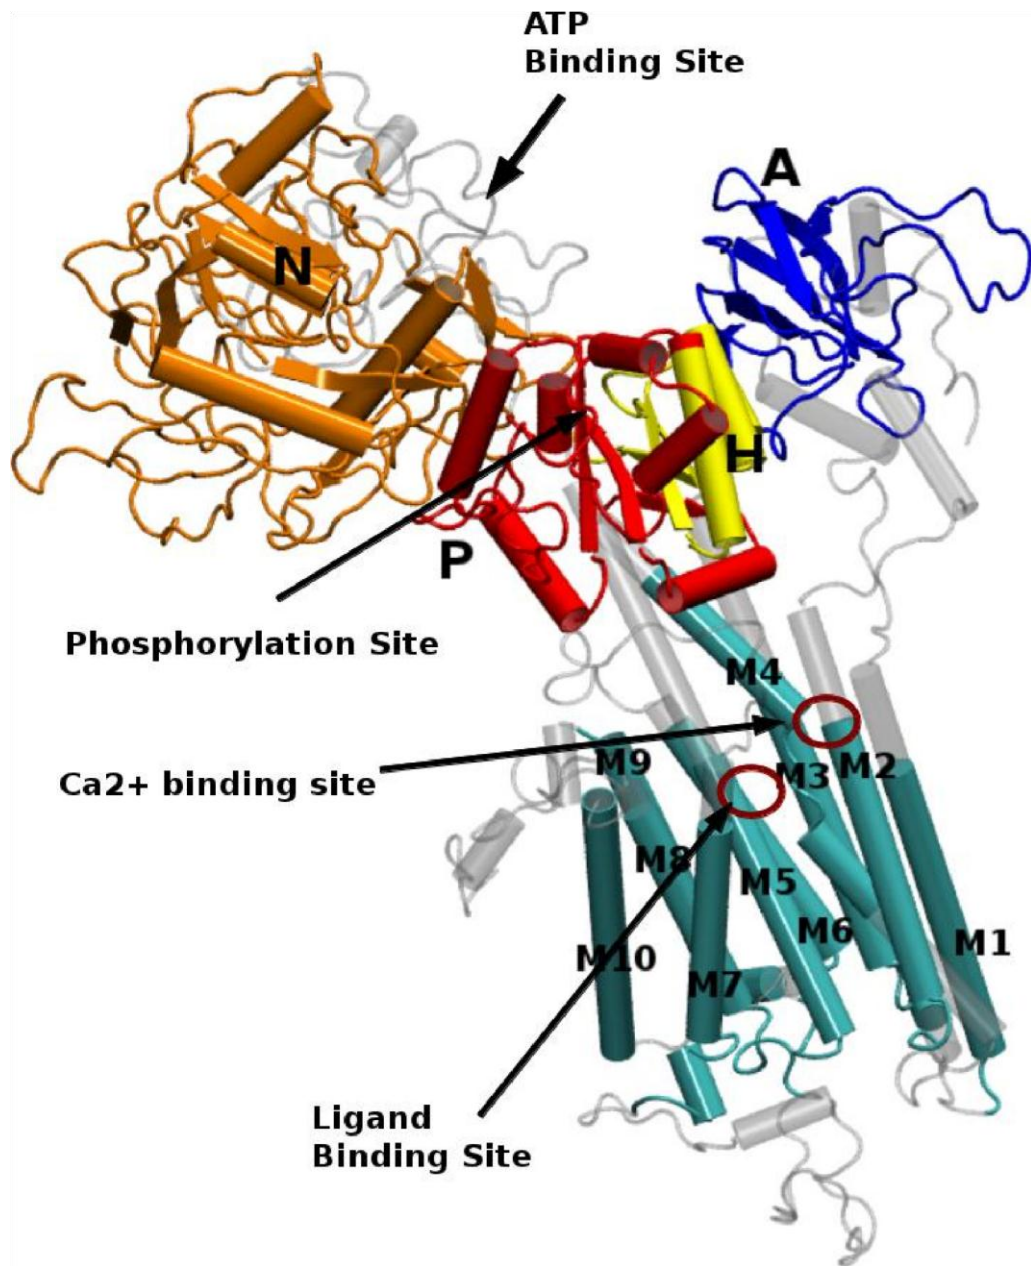

**Fig. S3.** Overview of the structure of the Ca<sup>2+</sup> bound PfATP6. Domains depicted are nucleotide domain (N) (orange), phosphorylation domain (red), actuator domain (blue), hinge domain (H) (yellow) and the transmembrane region including 10 helices (M1-M10) (cyan). Marked circle between M3, M5 and M7 is the ligand binding site and the circle between M2, M3 and M4 is the calcium binding site.

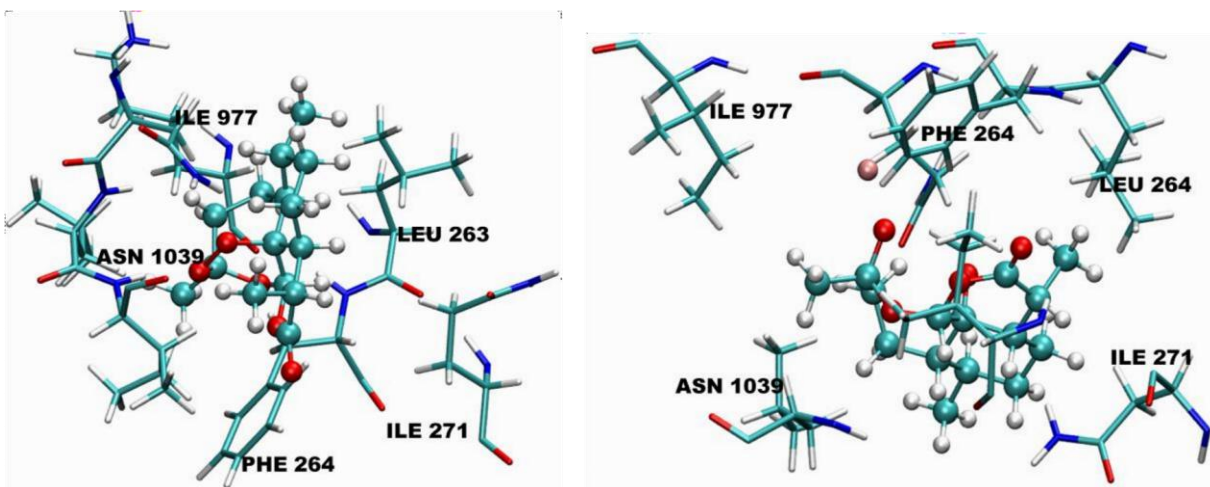

**Fig. S4.** Initial docked structure of Artemisinin with SERCA on the left; Fe-artemisinin adduct docked to SERCA on the right.

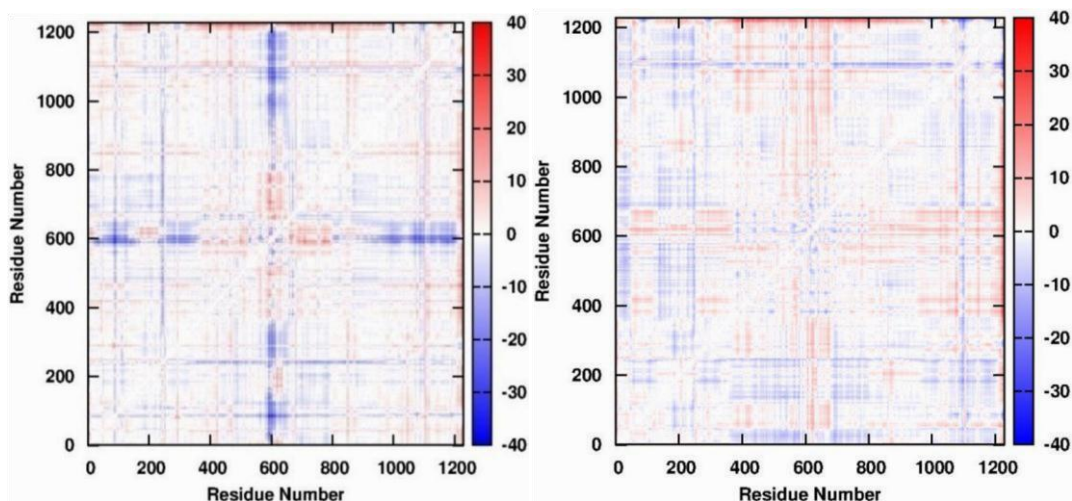

**Fig. S5.** Differential contact map artemisinin and Fe-activated artemisinin with Free SERCA showing Nucleotide domain and actuator domain coming closer whereas with Fe-activated artemisinin they are moving farther. Residues 580-620 is part of Nucleotide domain and residue 1-50 and 220-270 is part of actuator domain. Blue region shows decrease in distances whereas red region shows increase in distance throughout the trajectory.



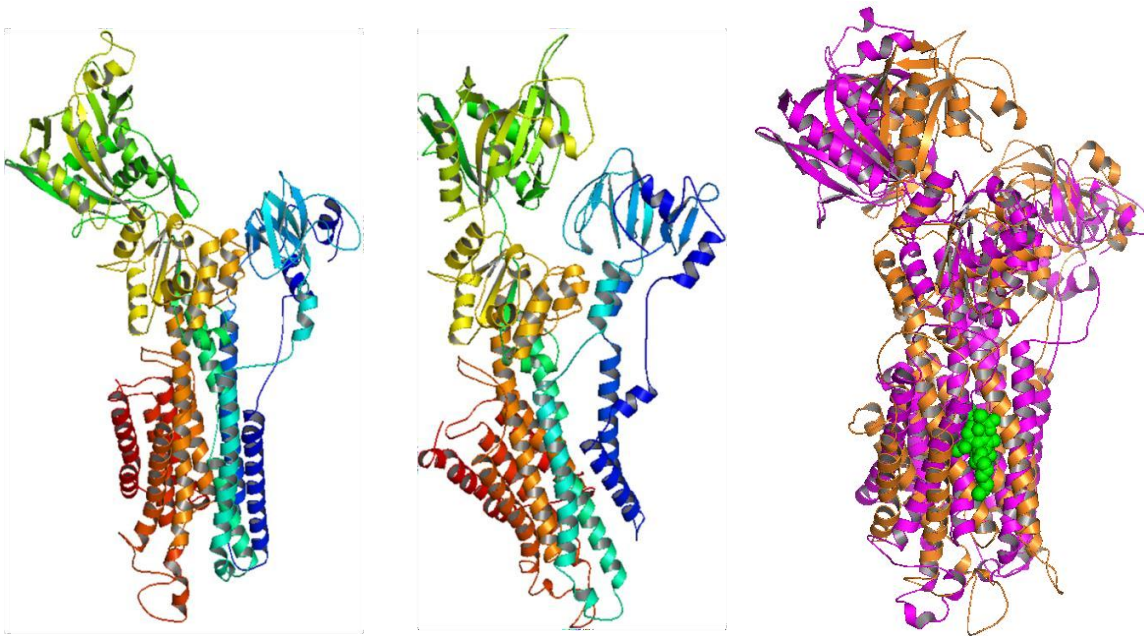

**Fig S6.** Crystal structure of mammalian SERCA (1SU4) Cytosolic region including Nucleotide binding domain and Actuator domain getting closed after 40 ns of simulation in presence of Thapsigargin. We have also shown the superimposed image of crystal structure of mammalian SERCA prior (pink) and after (orange) the MD simulation. RMSD between these two structures is 11 Å.

For further clarity we have also incorporated a distance plot between the interatomic distances between side chain atoms of ASP 133 and LYS464 from nucleotide binding domain and actuator domain respectively of the mammalian SERCA.

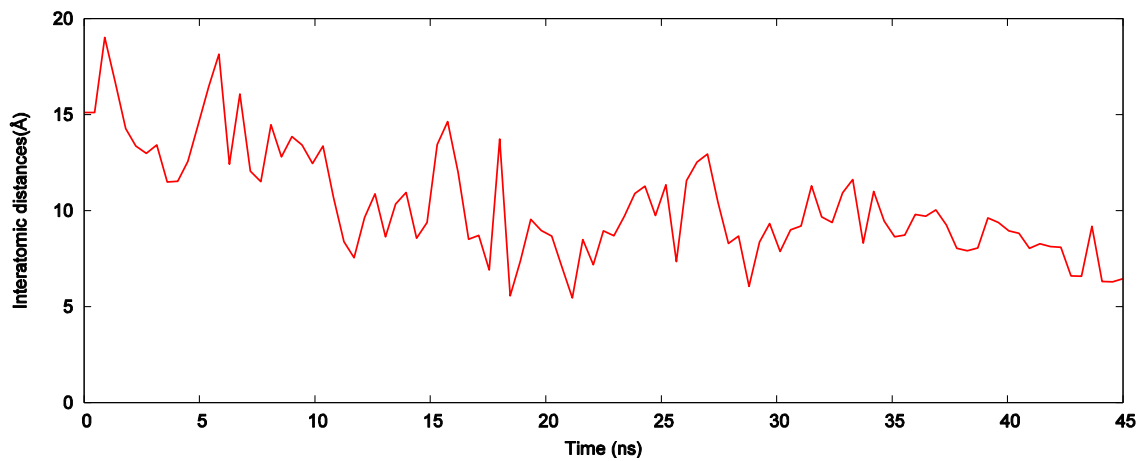

**Fig S7.** Interatomic distances between side chains of ASP 133 and side chain of LYS 464 from the cytoplasmic region (nucleotide binding domain and actuator domain respectively)

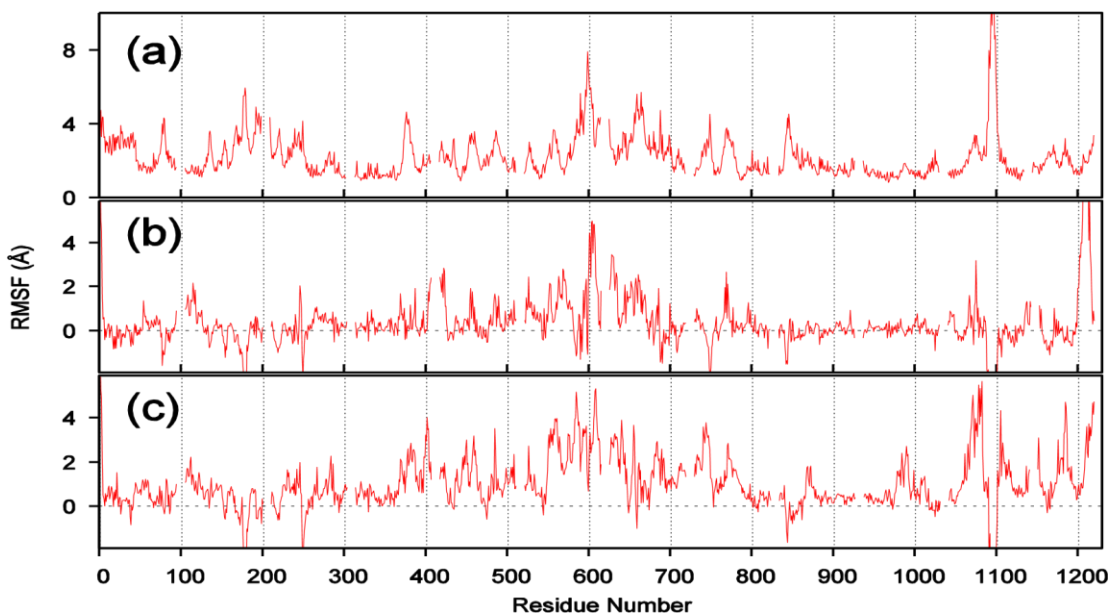

**Fig. S8.** RMSF plot for (a) *pfATP6* enzyme, (b) artemisinin- *pfATP6* system and (c) Fe-artemisinin adduct *pfATP6* system. For artemisinin and Fe-artemisinin bound system rmsf difference with respect to *pfATP6* enzyme is plotted. Residue number 580 to 700 is the loop region of Nucleotide binding domain. Residue 256-282 are part of M1 helix.

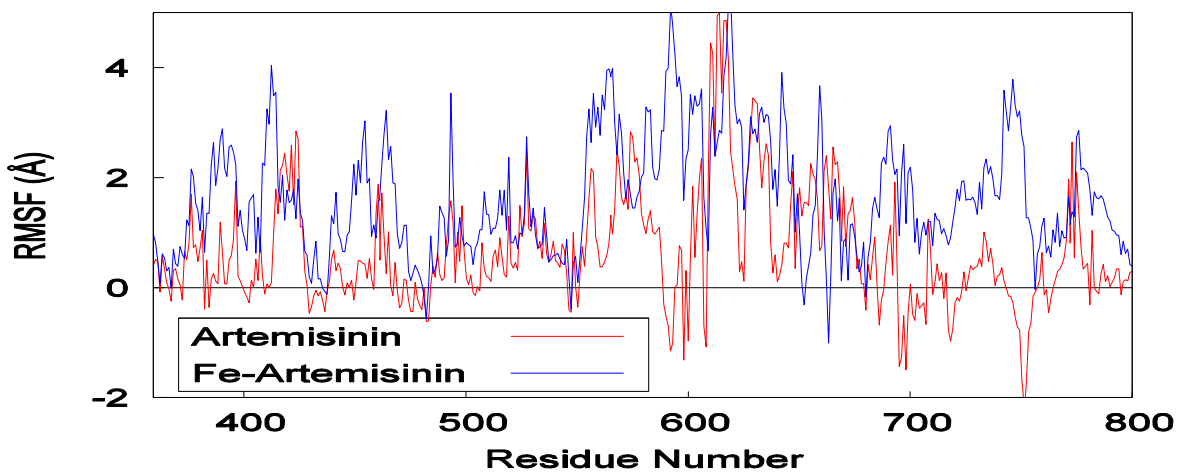

**Fig. S9.** Differential root mean square fluctuation map of Artemisinin (blue) and Fe-artemisinin adduct (red) bound SERCA with  $\text{Ca}^{2+}$  bound SERCA.

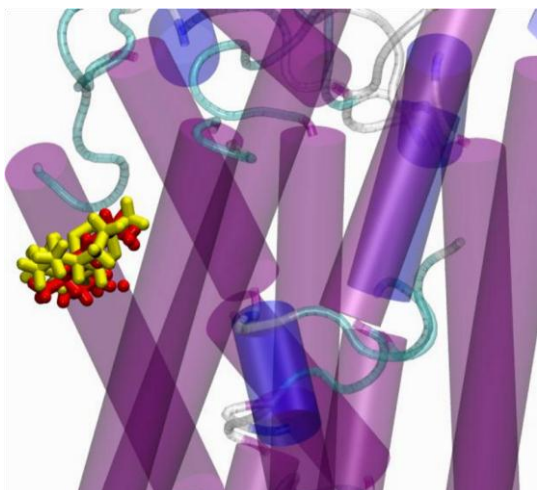

Fig. 5a

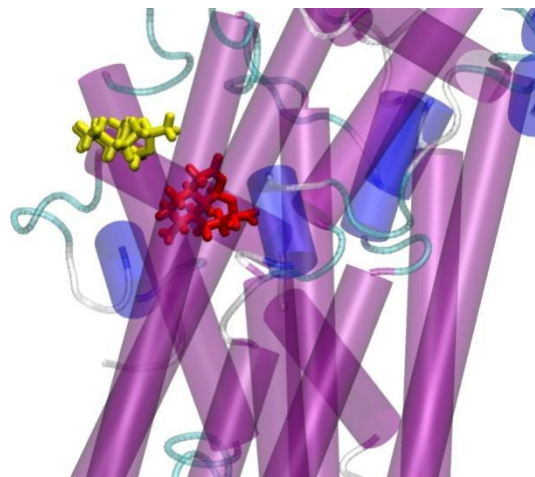

Fig. 5b

**Fig. S10.** (a) Artemisinin (yellow) and Fe-artemisinin (red) adduct docked to *pf*ATP6 at the start of the MD simulation initial coordinates. (b) Fe-artemisinin adduct (red) moves towards the ligand binding site disrupting the helical region after 40ns.

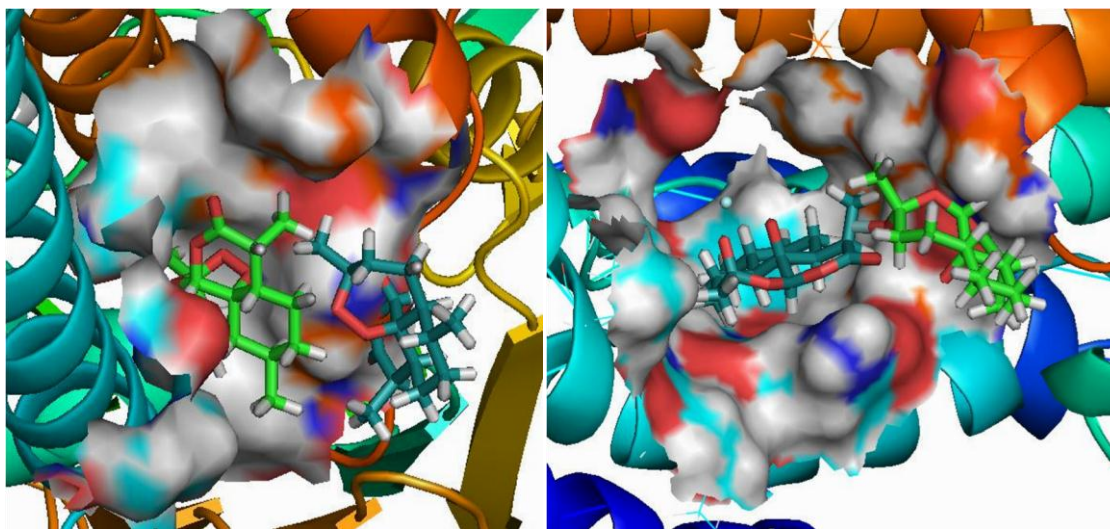

**Fig. S11.** Artemisinin (cyan) coming out of the cavity after simulation (see left panel) and Fe-activated artemisinin (cyan) moves inside the membrane region or the defined cavity (right panel).

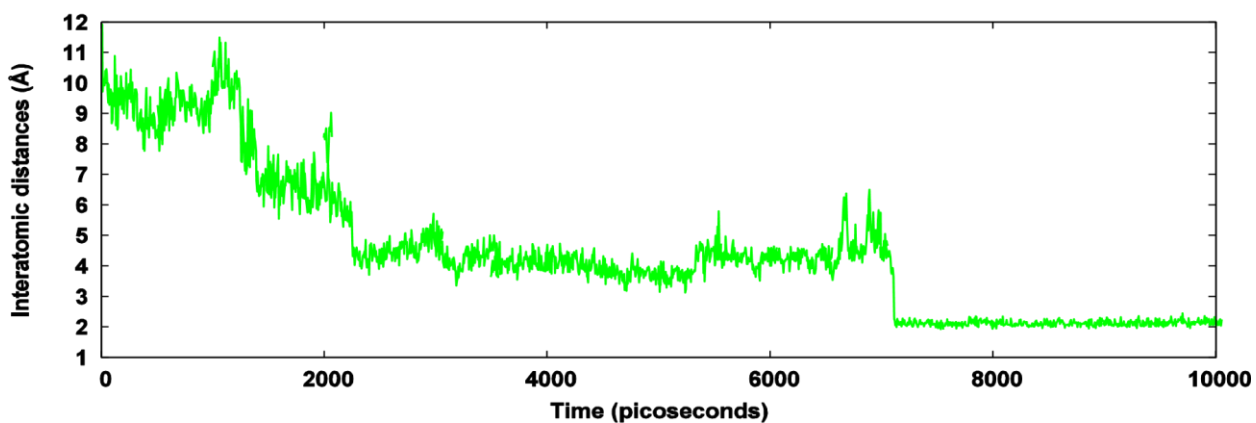

**Fig. S12.** Inter-atomic distance between Fe-artemisinin adduct and side chain of residue ASN 980

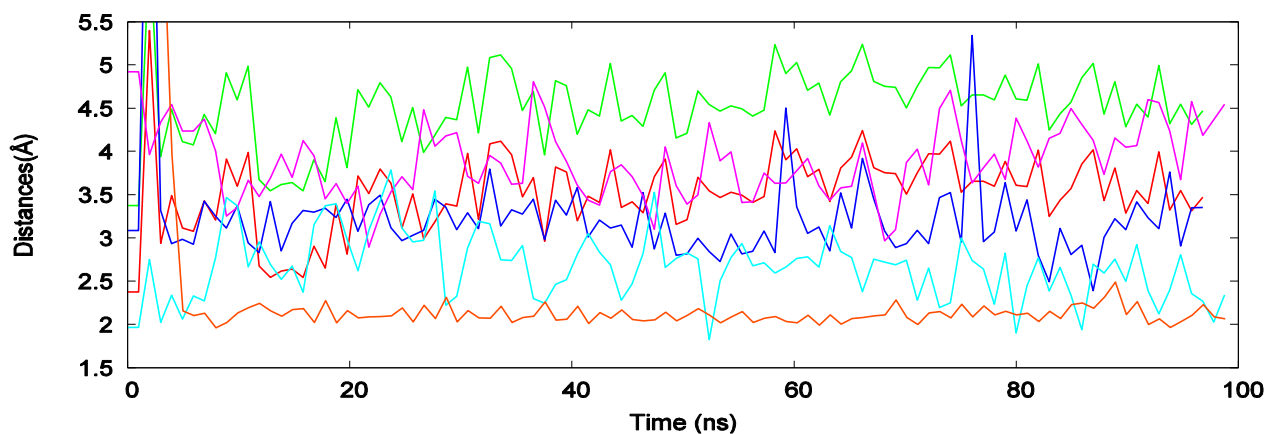

**Fig. S13.** Inter atomic distances between Artemisinin carbonyl oxygen atom and N-H of the main chain LEU 263 (green), ILE 977 (pink), ASN 1039 (red) which is more than the hydrogen bond cutoff of 3.2 Å however inter atomic distances between atoms of Fe-artemisinin adduct and LEU 263 (blue), ILE 977 (cyan), ASN 1039 (orange) shown is less than the cutoff distance which is modulating the motion of two domains.

**Supplementary Table 1.** Partial atomic charges

| Molecule                   | Selective Atoms (Charge $e^-$ )                                                                                                           |
|----------------------------|-------------------------------------------------------------------------------------------------------------------------------------------|
| Artemisinin                | O <sub>1</sub> (-0.323), O <sub>2</sub> (-0.321), O <sub>11</sub> (-0.528), O <sub>13</sub> (-0.591), O <sub>14</sub> (-0.590)            |
| Deoxy-Artemisinin          | O <sub>1</sub> (-0.586), O <sub>10</sub> (-0.543), O <sub>12</sub> (-0.577), O <sub>13</sub> (-0.587)                                     |
| Heme-Artemisinin (triplet) | O <sub>1</sub> (-0.561), O <sub>2</sub> (-0.585), O <sub>11</sub> (-0.548), O <sub>13</sub> (-0.596), O <sub>14</sub> (-0.665), Fe(0.710) |

## Supplementary Table 2.

Comparative RMSDs of three dimensional structures of Ca<sup>2+</sup>-ATPase representative and there transport intermediates

| Functional State                                       | PDB id.<br>Organism<br><i>Oryctolagus cuniculus</i> | Seq. length<br>994<br>Resolution<br>(Å) | Ligands/<br>Identifiers | RMSD (Å)<br>A-domain | RMSD (Å)<br>N-domain | RMSD (Å) All<br>atom | Reference                                      |
|--------------------------------------------------------|-----------------------------------------------------|-----------------------------------------|-------------------------|----------------------|----------------------|----------------------|------------------------------------------------|
| Ca <sup>2+</sup> E1                                    | 1SU4                                                | 2.40                                    |                         | 0.0                  | 0.0                  | 0.0                  | <i>Nature</i> <b>405</b> 647 (2000)            |
| HnE2                                                   | 1IWO                                                | 3.10                                    | TG1                     | 1.088                | 1.179                | 13.97                | <i>Nature</i> <b>418</b> 605 (2002)            |
| Ca <sup>2+</sup> E2                                    | 1KJU                                                | 6.0*                                    | ACP                     | 2.811                | 1.58                 | 13.29                | <i>Jour. of Mol. Bio</i> <b>316</b> 201 (2002) |
| Ca <sup>2+</sup> -E1-AMPPCP                            | 1T5S                                                | 2.6                                     | ADP                     | 1.842                | 1.279                | 13.55                | <i>Science</i> <b>304</b> 1672 (2004)          |
| Ca <sup>2+</sup> -E1-ADP:AlF <sub>4</sub> <sup>-</sup> | 1T5T                                                | 2.9                                     | ADP, ALF                | 1.842                | 1.323                | 13.58                | <i>Science</i> <b>304</b> 1672 (2004)          |
| E1-AMPPCP                                              | 1VFP                                                | 2.9                                     | ACP                     | 1.763                | 1.768                | 13.75                | <i>Nature</i> <b>430</b> 529 (2004)            |
| E2-AlF <sub>4</sub> <sup>-</sup>                       | 1XP5                                                | 3.0                                     | ALF                     | 0.906                | 1.401                | 13.46                | <i>Science</i> <b>306</b> 2251 2004            |
| E2·MgF <sub>4</sub> <sup>2-</sup>                      | 1WPG                                                | 2.3                                     | ADP, MF <sub>4</sub>    | 1.117                | 0.738                | 13.79                | <i>Nature</i> <b>432</b> 361 2004              |
| E2-(TG)BHQ                                             | 2AGV                                                | 2.4                                     | TG, BHQ                 | 0.962                | 1.046                | 14.02                | <i>PNAS</i> <b>102</b> 14589 2005              |
| E2(TG)                                                 | 2C8K                                                | 2.8                                     | ACP                     | 0.993                | 1.547                | 13.93                | <i>Embo. J.</i> <b>25</b> 2305 2006            |
| E2(TG)                                                 | 2C8L                                                | 3.1                                     | TG1                     | 0.974                | 1.654                | 13.56                | <i>Embo. J.</i> <b>25</b> 2305 2006            |
| E2(TG):AMP<br>PCP                                      | 2C88                                                | 3.1                                     | ACP                     | 1.003                | 1.554                | 13.96                | <i>Embo. J.</i> <b>25</b> 2305 2006            |
| Ca <sup>2+</sup> E1                                    | 2C9M                                                | 3.0                                     |                         | 0.367                | 1.096                | 2.447                | <i>Embo. J.</i> <b>25</b> 2305 2006            |

|                                |      |      |               |       |       |       |                                     |
|--------------------------------|------|------|---------------|-------|-------|-------|-------------------------------------|
|                                | 2DQS | 2.5  | ACP, TG1      | 0.993 | 1.547 | 13.92 | To be published                     |
| E2(TG)P2                       | 2EAR | 3.10 | TG1           | 0.864 | 1.014 | 13.94 | <i>PNAS</i> <b>104</b> 5800 (2007)  |
| E2CPA                          | 2EAS | 3.40 | CPA           | 1.215 | 1.667 | 14.01 | <i>PNAS</i> <b>104</b> 5800 (2007)  |
| E2(CPATTG )                    | 2EAT | 2.90 | CZA,TG1       | 1.189 | 1.601 | 13.84 | <i>PNAS</i> <b>104</b> 5800 (2007)  |
| E2(CPATCC )                    | 2EAU | 2.80 | CZP, PT4      | 1.211 | 1.658 | 13.93 | <i>PNAS</i> <b>104</b> 5800 (2007)  |
| E2-P <sub>1</sub>              | 2ZBD | 2.40 | ADP           | 0.92  | 1.016 | 13.79 | <i>Nature</i> <b>432</b> 361 (2004) |
| E2-BF <sub>3</sub>             | 2ZBE | 3.80 | PC1           | 1.166 | 1.766 | 13.57 | <i>PNAS</i> <b>104</b> 19831 (2007) |
| E2-BF <sub>3</sub> .TG         | 2ZBF | 2.40 | BEF           | 0.871 | 1.339 | 12.39 | <i>PNAS</i> <b>104</b> 19831 (2007) |
| E2-ALF.TG                      | 2ZBG | 2.55 | ALF,TG1       | 0.941 | 0.797 | 13.76 | <i>PNAS</i> <b>104</b> 19831 (2007) |
| E1-AMPPCP                      | 3AR2 | 2.50 | ACP           | 1.197 | 1.772 | 13.58 | <i>PNAS</i> <b>108</b> 1833 (2011)  |
| E2-ADP(TG)                     | 3AR3 | 2.30 | ADP           | 0.852 | 1.038 | 13.96 | <i>PNAS</i> <b>108</b> 1833 (2011)  |
| E2-ATP(TG)                     | 3AR4 | 2.15 | ATP,TG1       | 0.861 | 1.042 | 13.93 | <i>PNAS</i> <b>108</b> 1833 (2011)  |
| E2-TNP-AMP (TG)                | 3AR5 | 2.20 | TNP, AMP, TG1 | 0.868 | 1.039 | 13.96 | <i>PNAS</i> <b>108</b> 1833 (2011)  |
| E2-TNP-ADP (TG)                | 3AR6 | 2.20 | TNP, ADG, TG1 | 0.887 | 1.019 | 13.94 | <i>PNAS</i> <b>108</b> 1833 (2011)  |
| E2-TNP-ATP (TG)                | 3AR7 | 2.15 | 128, PT4, TG1 | 0.897 | 1.037 | 13.96 | <i>PNAS</i> <b>108</b> 1833 (2011)  |
| E2-ALF <sub>4</sub> -TNP-AMPCC | 3AR8 | 2.60 | ALF, TG1, TM1 | 0.95  | 0.781 | 13.74 | <i>PNAS</i> <b>108</b> 1833 (2011)  |



|                                            |                   |      |               |       |       |       |                                              |
|--------------------------------------------|-------------------|------|---------------|-------|-------|-------|----------------------------------------------|
| E2-BeF <sub>3</sub> -TNP-AMP(TG)           | 3AR9              | 2.60 | BEF, TG1, TM1 | 0.893 | 1.343 | 12.33 | <i>PNAS</i> <b>108</b> 1833 (2011)           |
| Ca <sup>2+</sup> E1P                       | 3BA6              | 2.80 | AN2           | 1.146 | 1.297 | 12.14 | <i>Nature</i> <b>450</b> 1036 (2007)         |
| E2-AlF <sub>4</sub> <sup>-</sup>           | 3N5K              | 2.20 | ACT ALF       | 1.228 | 0.894 | 13.41 | <i>JBC</i> <b>288</b> 10759 (2013)           |
| E2-BeF <sub>3</sub>                        | 3B9B              | 2.65 | BEF           | 1.79  | 1.32  | 13.55 | <i>Nature</i> <b>450</b> 1036 (2007)         |
| E2-AlF <sub>4</sub> <sup>-</sup>           | 3B9R              | 3.00 | ACP, ALF      | 0.918 | 1.626 | 13.57 | <i>Nature</i> <b>450</b> 1036 (2007)         |
| Ca <sup>2+</sup> -E <sub>1</sub> -CaAMPPCP | 3N8G              | 2.59 | ACP           | 1.835 | 1.336 | 13.57 | <i>JBC</i> <b>288</b> 10759 (2013)           |
| E1.Ca <sup>2+</sup> .ACP                   | 3TLM <sup>#</sup> | 2.95 | ACP           | 1.937 | 2.778 | 13.76 | <i>Jour. Str. Biol.</i> <b>178</b> 38 (2012) |
| E1.Mg <sup>2+</sup>                        | 3W5A              | 3.01 | PTY, TM1      | 0.765 | 1.133 | 9.67  | <i>Nature</i> <b>495</b> 260 (2013)          |
| E1.Mg <sup>2+</sup>                        | 3W5B              | 3.20 | PTY, TM1      | 0.89  | 1.157 | 9.57  | <i>Nature</i> <b>495</b> 260 (2013)          |
| E2                                         | 3W5C              | 2.50 | PTY           | 0.959 | 1.041 | 13.85 | <i>Nature</i> <b>495</b> 260 (2013)          |
| E2 + Pi                                    | 3W5D              | 2.45 | PTY, SO4      | 0.875 | 0.985 | 13.83 | <i>Nature</i> <b>495</b> 260 (2013)          |
| E1-SLN                                     | 4H1W              | 3.10 | ACP           | 0.792 | 1.093 | 10.60 | <i>Nature</i> <b>495</b> 265 (2013)          |

\*Resolution of 1KJU is with Electron microscopy

#3TLM is from *Bos Taurus* (cattle) as rest of them are from the organism *Oryctolagus Cuniculus*

### **Details of docking protocol:**

Identification of best possible grid/translational points in radius of 3Å around the reference points. b) Generation of protein grid and preparation of energy grid in and around the active site of protein to re calculate the energy of each atom in the candidate ligand c) Monte Carlo docking and intensive configurational search of the ligand in the active site and d) Identification of the best docked structures on an energy criterion and prediction of the binding free energy of the complex. Protein grid of length 10Å is generated in order to identifying the protein residues in a specified range which are interacting with the atoms of the candidate ligand. The Monte Carlo configurations are generated around six degrees of freedom which result in many combinations of ligand configuration, energy points are selected and pre calculated energy of each atom is added. The scoring function employed considers the non-bonded energy of a protein-ligand complex as a sum of three energy terms electrostatic, van der Waals and hydrophobic.
